# Supplementary material for: Laser-induced inactivation of Plasmodium falciparum
Source: PubMed Central journal article supplement (PMC3464159; doi:10.1186/1475-2875-11-267), 2012-08-08

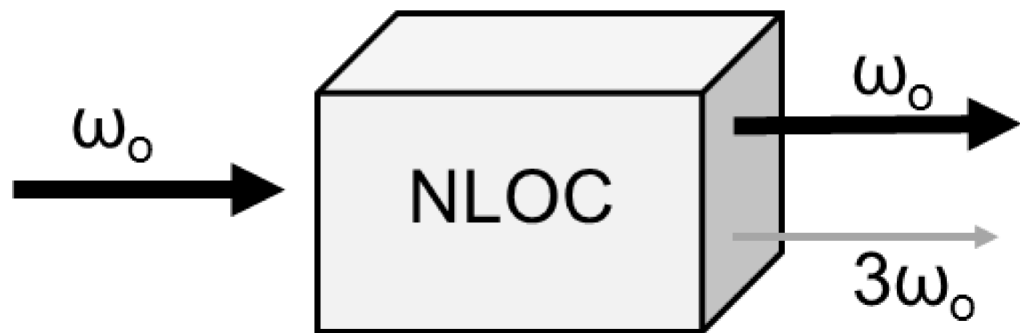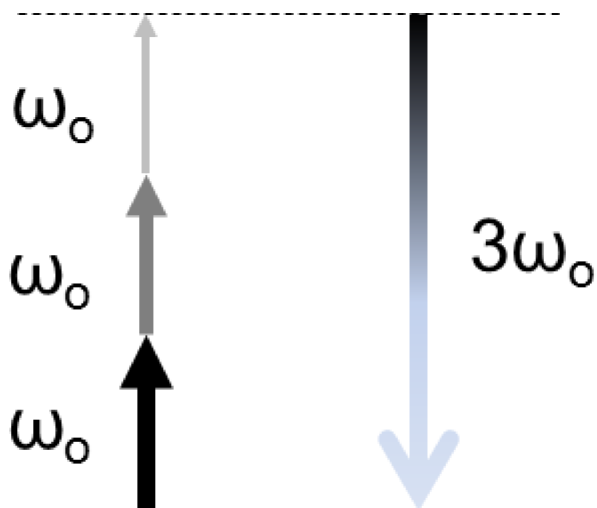

Supplement: 1475-2875-11-267-S2.pdf [file 1475-2875-11-267-S2.pdf]
